# Supplementary material for: A simple molecular beacon with duplex-specific nuclease amplification for detection of microRNA
Source: Royal Society of Chemistry journal article supplement (doi:10.1039/c5an02312b), 2015-12-09
Supplement: c5an02312b1.pdf [file c5an02312b1.pdf]

Electronic Supplementary Material (ESI) for Analyst.  
This journal is © The Royal Society of Chemistry 2015

***Supporting Information for***

**A simple molecular beacon with duplex-specific  
nuclease amplification for detection of microRNA**

Yingcun Li,<sup>a</sup> Jiangyan Zhang,<sup>a\*</sup> Likun Zhao,<sup>a</sup> Jingjing Zhao,<sup>a</sup> Yongqiang Cheng<sup>a\*</sup> and Zhengping Li<sup>a</sup>

<sup>a</sup> Key Laboratory of Medicinal Chemistry and Molecular Diagnosis, Ministry of Education; Key Laboratory of Analytical Science and Technology of Hebei Province, College of Chemistry and Environmental Science, Hebei University, Baoding 071002, Hebei, P. R. China

Email: [hdzjy2005@163.com](mailto:hdzjy2005@163.com); [yqcheng@hbu.edu.cn](mailto:yqcheng@hbu.edu.cn)

**Content**

|                                                                                    |    |
|------------------------------------------------------------------------------------|----|
| <b>Fig. S1</b> The effect of DSN amount .....                                      | S2 |
| <b>Fig. S2</b> The effect of the reaction temperature .....                        | S2 |
| <b>Fig. S3</b> Melting temperature (T <sub>m</sub> ) measurement of MB probe ..... | S3 |
| <b>Fig. S4</b> The effect of the concentration of MB probe.....                    | S3 |
| <b>Fig. S5</b> The effect of the reaction time .....                               | S4 |
| <b>Table S1</b> Comparison of different methods for miRNA detection .....          | S4 |

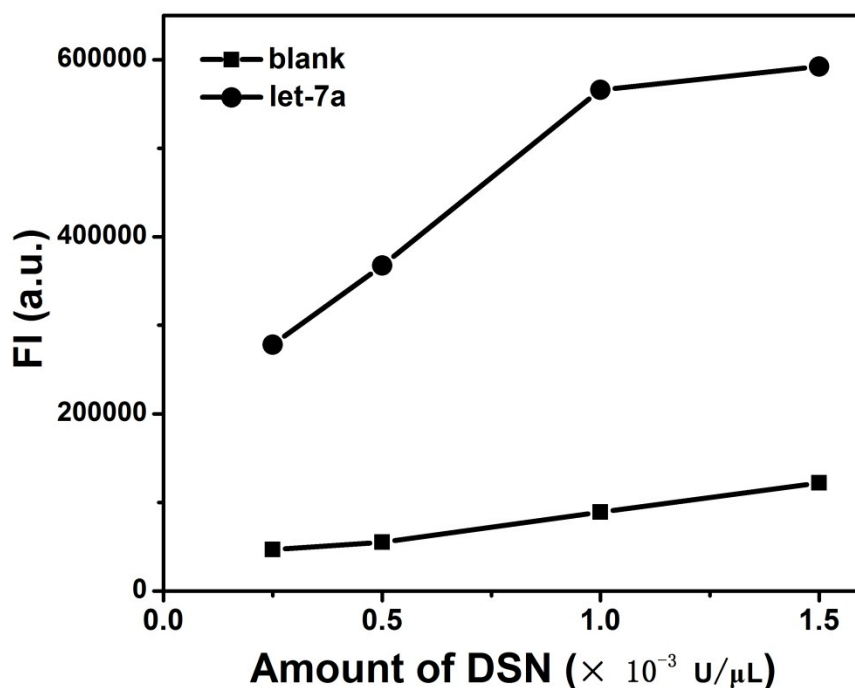

**Fig. S1** The effect of DSN amount. The concentration of let-7a in the blank and the sample was 0 pM, 250 pM respectively. The reaction volume was 10  $\mu$ L and reaction products were diluted by 20 times with TE buffer solution (10 mM Tris-HCl (pH 8.0) 1 mM EDTA) before fluorescence measurement.

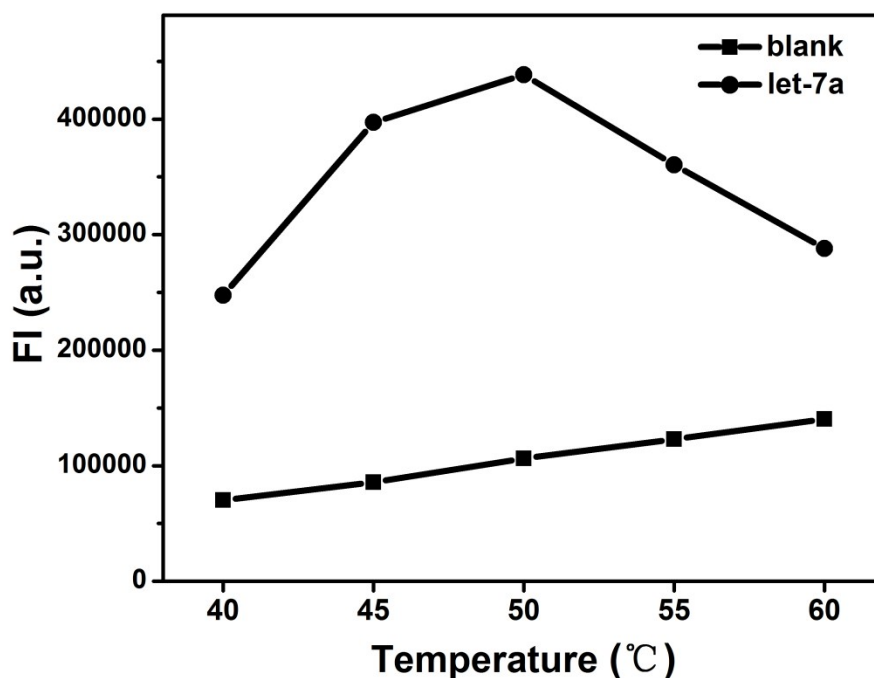

**Fig. S2** The effect of the reaction temperature. The concentration of let-7a in the blank and the sample was 0 pM, 250 pM respectively. The reaction volume was 10  $\mu$ L and reaction products were diluted by 20 times with TE buffer solution before fluorescence measurement.

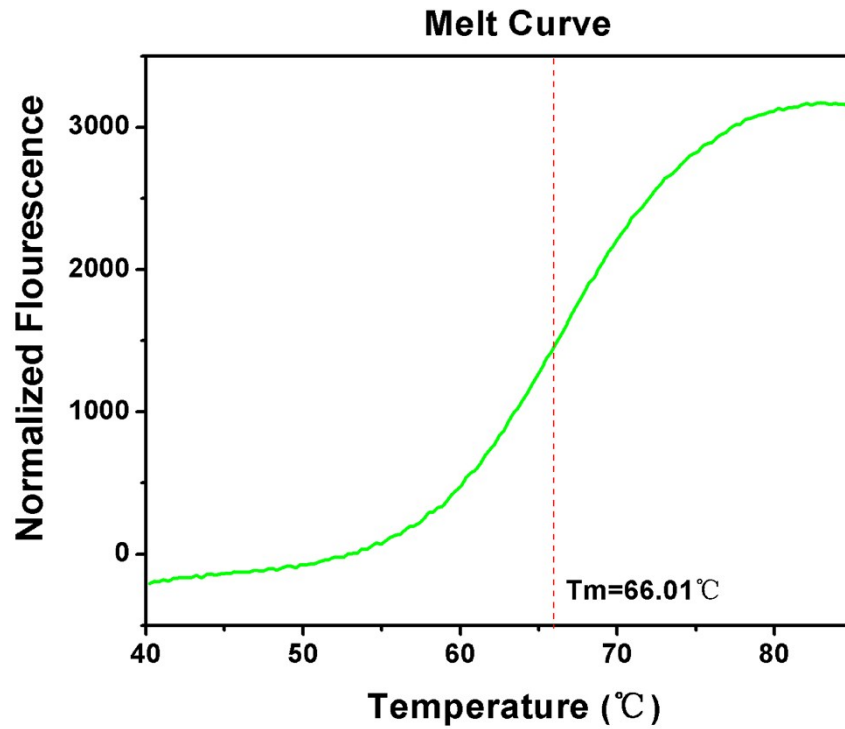

**Fig. S3** Melting temperature ( $T_m$ ) measurement of MB probe.  $T_m$  measurement was performed in the StepOne Real Time PCR System. The concentration of probe mb-a1 was 200 nM in 10  $\mu\text{L}$  reaction solution.

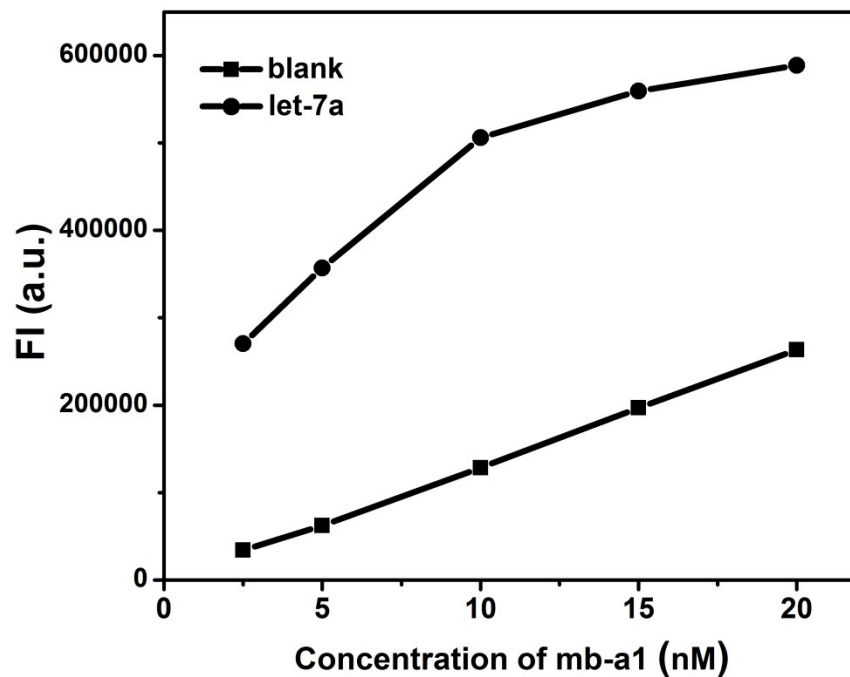

**Fig. S4** The effect of the concentration of MB probe. The concentration of let-7a in the blank and the sample was 0 pM, 250 pM respectively. The reaction volume was 10  $\mu\text{L}$  and reaction products were diluted by 20 times with TE buffer solution before fluorescence measurement.

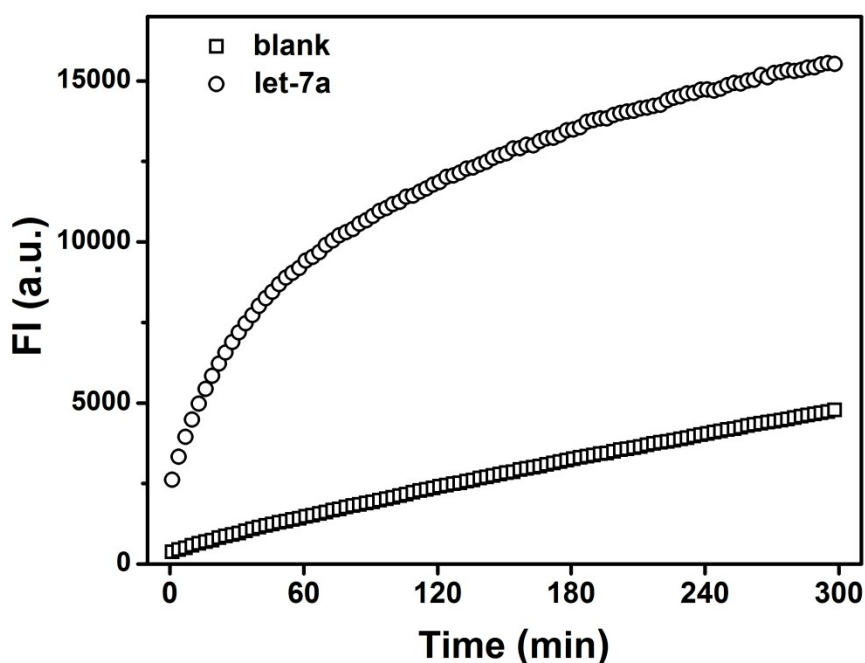

**Fig. S5** The effect of the reaction time. The concentration of let-7a was 0 nM, 5 nM in the blank and the sample respectively.

**Table S1** Comparison of different methods for miRNA detection

| Method                           | Sensitivity      | Selectivity         | Simplicity                                       | Time       | ref |
|----------------------------------|------------------|---------------------|--------------------------------------------------|------------|-----|
| Northern Blotting with LNA probe | 0.5 µg total RNA | two-base difference | complex separation procedure                     | >17 h      | 1   |
| RCA                              | 10 fM            | one-base difference | simple probe                                     | 8 h        | 2   |
| Stem-loop RT-PCR                 | 1 aM             | one-base difference | complex probe design                             | >2 h       | 3   |
| signal-amplifying ribozymes      | 5 nM             | — <sup>a</sup>      | complex probe design                             | 10 min     | 4   |
| DSN with DNA peroxidase probe    | 20 pM            | — <sup>a</sup>      | two-step detection procedure                     | 2 h 45 min | 5   |
| DSN with DNA– AuNP probe         | 5 pM             | — <sup>a</sup>      | preparation of AuNP and conjugation of DNA– AuNP | 5 h        | 6   |
| DSN with 2-OMe-RNA MB probe      | 0.5 pM           | one-base difference | 2-OMe-RNA modified probe                         | 40 min     | 7   |
| this work                        | 5 pM             | one-base difference | Simple probe design and procedure                | 2 h        |     |

<sup>a</sup> “—” represents the data are not available.

## References

1. E. Várallyay, J. Burgyán and Z. Havelda, *Nat. Protoc.*, 2008, **3**, 190-196.
2. Y. Cheng, X. Zhang, Z. Li, X. Jiao, Y. Wang and Y. Zhang, *Angew. Chem.*, 2009, **121**, 3318-3322.
3. C. Chen, D. A. Ridzon, A. J. Broomer, Z. Zhou, D. H. Lee, J. T. Nguyen, M. Barbisin, N. L. Xu, V. R. Mahuvakar and M. R. Andersen, *Nucleic Acids Res.*, 2005, **33**, e179.
4. J. S. Hartig, I. Grüne, S. H. Najafi-Shoushtari and M. Famulok, *J. Am. Chem. Soc.*, 2004, **126**, 722-723.

5. T. Tian, H. Xiao, Z. Zhang, Y. Long, S. Peng, S. Wang, X. Zhou, S. Liu and X. Zhou, *Chem. Eur. J.*, 2013, **19**, 92-95.
6. F. Degliangeli, P. Kshirsagar, V. Brunetti, P. P. Pompa and R. Fiammengo, *J. Am. Chem. Soc.*, 2014, **136**, 2264-2267.
7. X. Lin, C. Zhang, Y. Huang, Z. Zhu, X. Chen and C. James Yang, *Chem. Commun.*, 2013, **49**, 7243-7245.
